# Supplementary material
Source: PubMed Central journal article supplement (PMC8408472)
Supplement: supplementary_legends_bhab124.pdf [file supplementary_legends_bhab124.pdf]

## Supplementary Legends

Extended Data Figure 1. Breathing abnormalities in P0 Aut2 cKO pups. (a-f) Nes11-Cre (pan-CNS) Aut2 cKO mice. Representative plethysmography traces from control (a; n=7), heterozygous (b; n=7), and homozygous cKO (c; n=3) animals on P0. Abnormal breathing events (gasps, sighs, apneas) are indicated. Breathing frequency (d) was reduced ( $p=0.005$ ); tidal volume (e) was increased ( $p=0.041$ ); and breathing rhythms (f) were more irregular ( $p=0.002$ ) in Nes11-Cre Aut2 cKO pups. (one-way ANOVA,  $P=0.0406$ ). (g-i) Emx1-Cre Aut2 cKOOctx mice. Breathing frequency was reduced ( $p=0.041$ ), but other parameters were not significantly different in heterozygous (n=3) or homozygous (n=3) cKO mice from controls (n=3).

Respiratory metrics represented as mean + S.E.M. \*,  $p<0.05$ ; \*\*,  $p<0.005$ .

Extended Data Figure 2. Histology of P5 control and Aut2 cKOOctx forebrain. (a-d) DAPI-stained sections (fluorescence inverted) showed no abnormalities of neocortex (arrows) in homozygous Aut2 cKOOctx brains (b, d) compared to controls (a, c). However, the DG (arrowheads) appeared slightly smaller in Aut2 cKOOctx brains, as confirmed at higher magnification (c, d). Scale bar: B, 0.5 mm for a, b; 100  $\mu$ m for c, d.

Extended Data Figure 3. Tbr2<sup>+</sup> INPs are decreased and Penk mRNA is upregulated in Aut2 cKOOctx DG (a, b) P0.5 dentate gyrus stained for TBR2 in control (a) and Aut2 cKOOctx (b) mice, white outlined region indicates region of cell quantification. (c) Boxplot of cell counts from matched sections of three cKO and three control animals (one-tailed wilcox p-value = 0.05). (d, e) P0.5. Cells in the molecular layer (marginal zone) of the DG (red outlines) expressed Penk at higher levels in Aut2 cKOOctx (e) than in control (d) mice. Penk was also increased in marginal zone cells of the adjacent subiculum (asterisks, e). (f, g) P7.5. Penk expression remained elevated in Aut2 cKOOctx (g) as compared to control (f) DG. Scale bars as indicated.

Extended Data Figure 4. Examination of unaffected marker genes at P0 in cortex and dentate gyrus (a, b) P0.5 cerebral cortex stained for layer VI marker TBR1 in control (a) and Aut2 cKOOctx (b) mice, images are oriented rostral cortex to the right (c, d) P0.5 cerebral cortex stained for layer II-III marker CUX1 in control (c) and Aut2 cKOOctx (d) mice, images are oriented rostral cortex to the right (e, f) P0.5 dentate gyrus stained for cajal-retzius cell marker Reelin (Reln) in control (e) and Aut2 cKOOctx (f) mice (g, h) P0.5 dentate gyrus stained for glial scaffolding

marker glial fibrillary acidic protein (Gfap) in control (g) and Aut2 cKOctx (h) mice

Extended Data Figure 5. Interaction network of proteins encoded by DETs bound by AUTS2 or expressed by genes with AUTS2 ChIP-seq peaks. (a) Transcripts that were bound and regulated by AUTS2 in vivo (Table 1) encoded proteins that formed a significant interaction network ( $p=0.01$ ) as determined by STRING-DB. (b) Transcripts that were regulated by AUTS2, and whose cognate genes were bound by AUTS2, encoded proteins that formed no significant interaction network.
